# Supplementary figures and images for: Angelman Syndrome and Angelman-like Syndromes Share the Same Calcium-Related Gene Signatures
Source: MDPI journal article supplement (doi:10.3390/ijms22189870), 2021-09-13

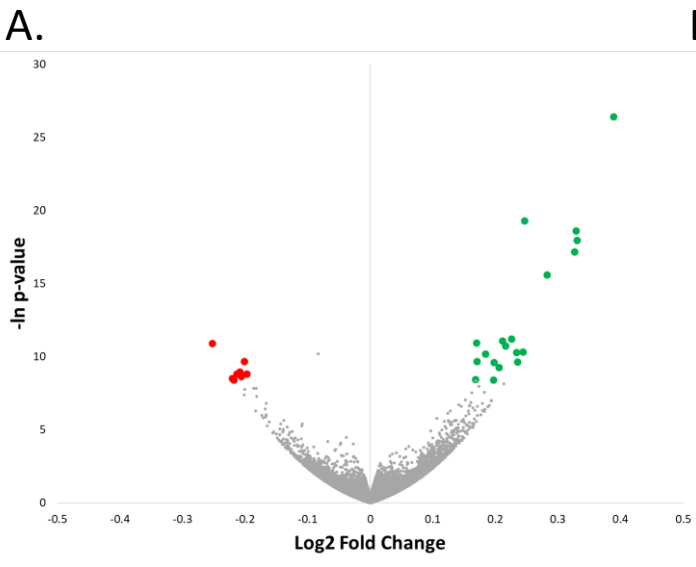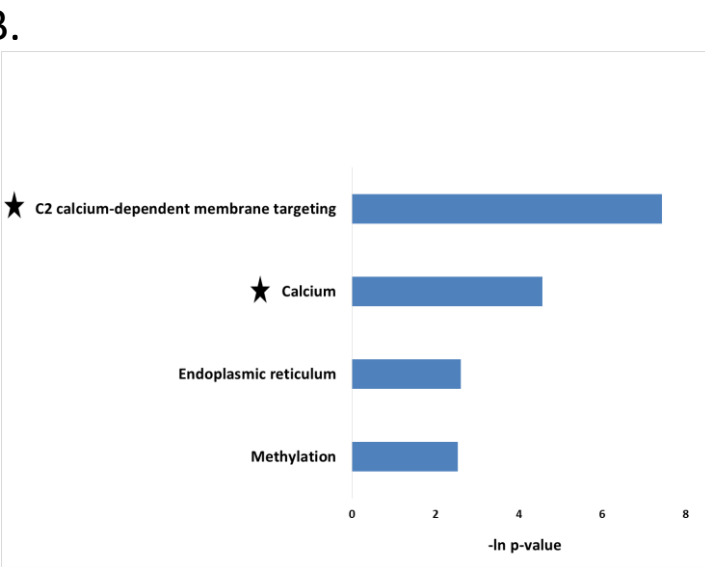

Supplement: s1 [file s1]

A.

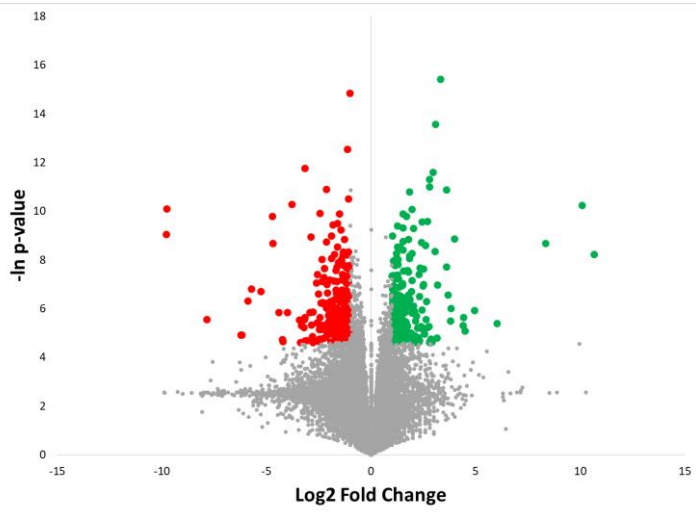

B.

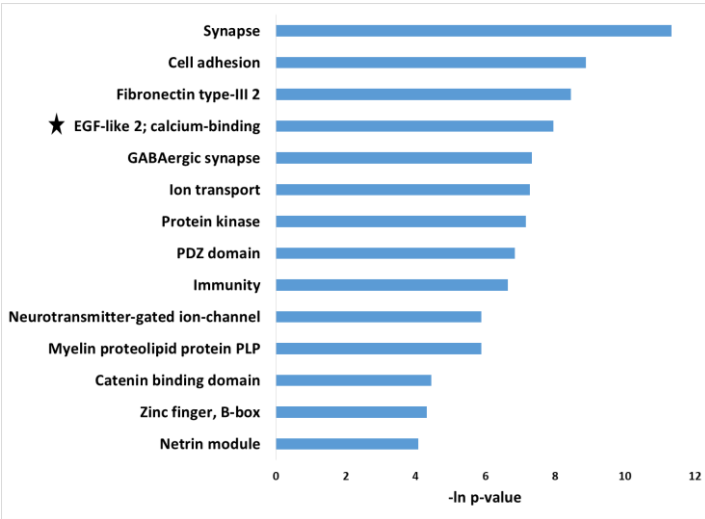

Supplement: s1 [file s1]

A.

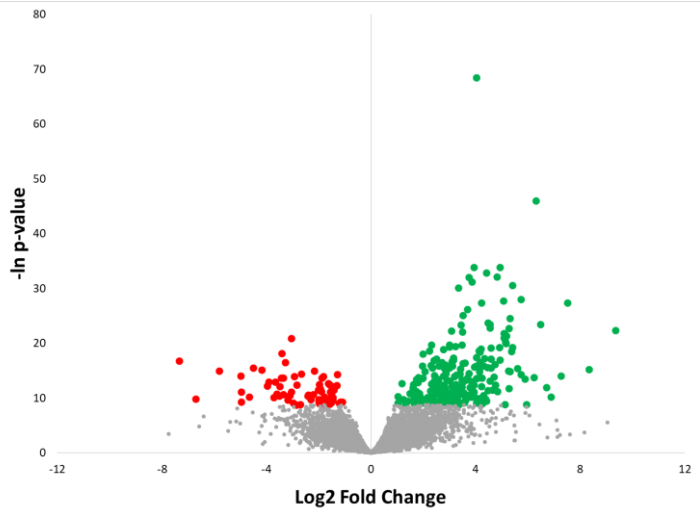

B.

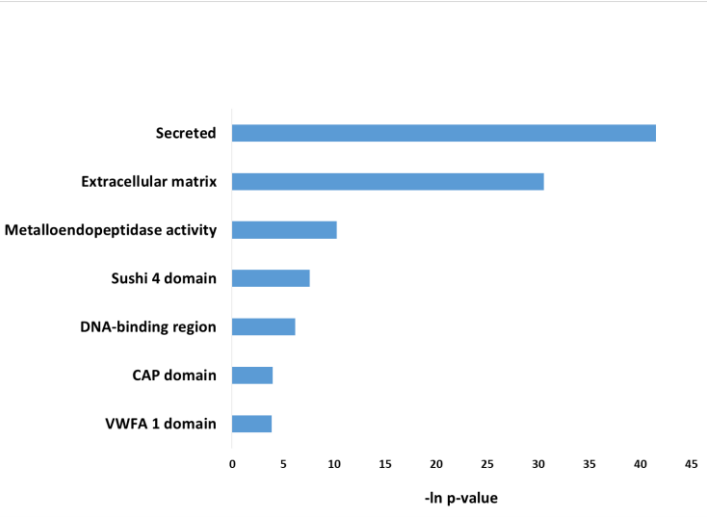

C.

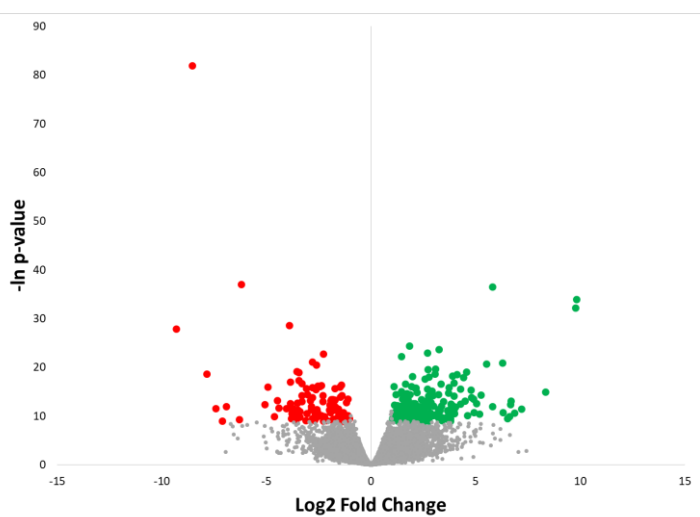

D.

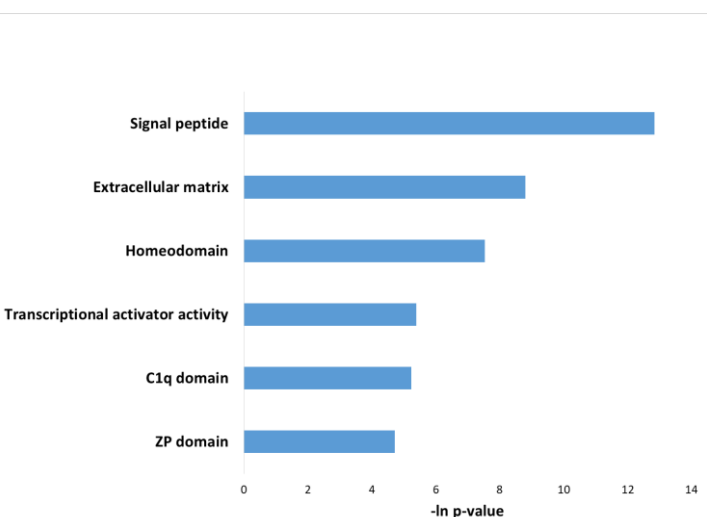

E.

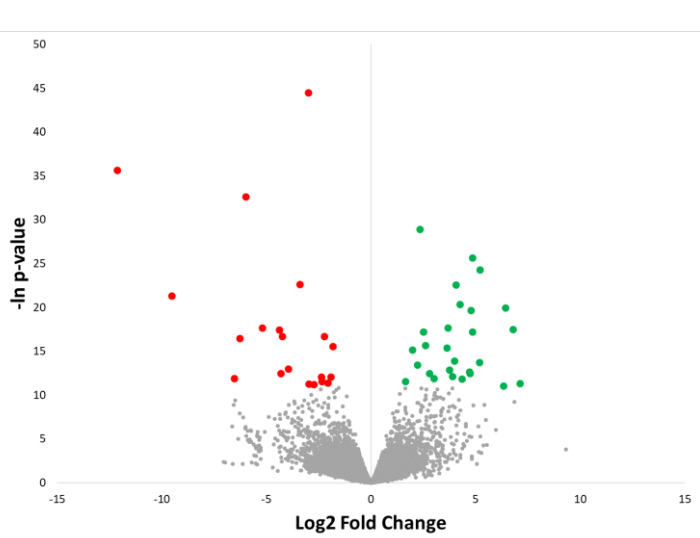

F.

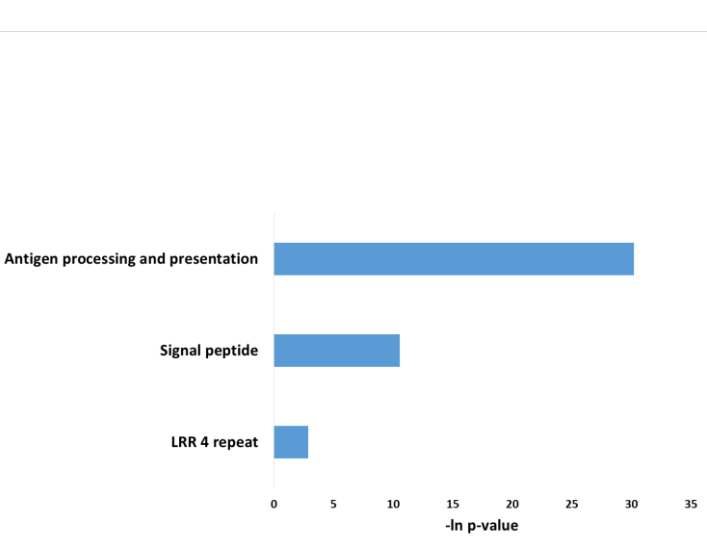

G.

H.

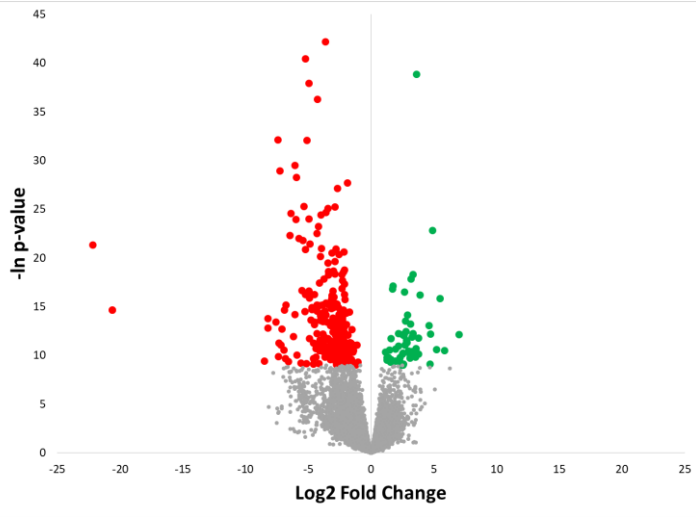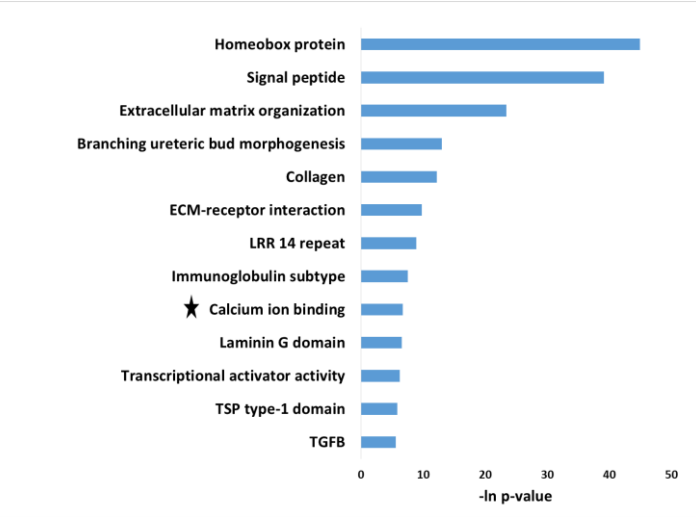

I.

J.

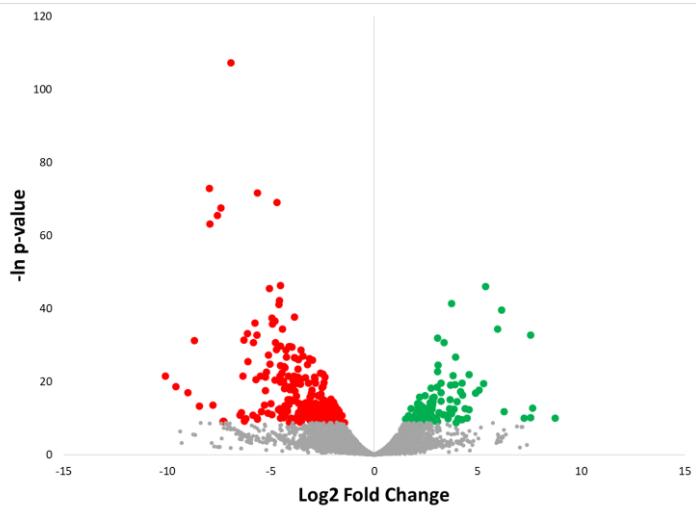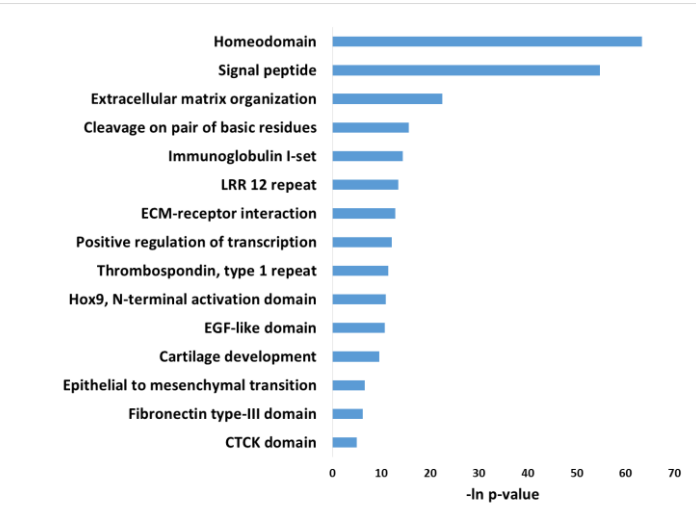

Supplement: s1 [file s1]

A.

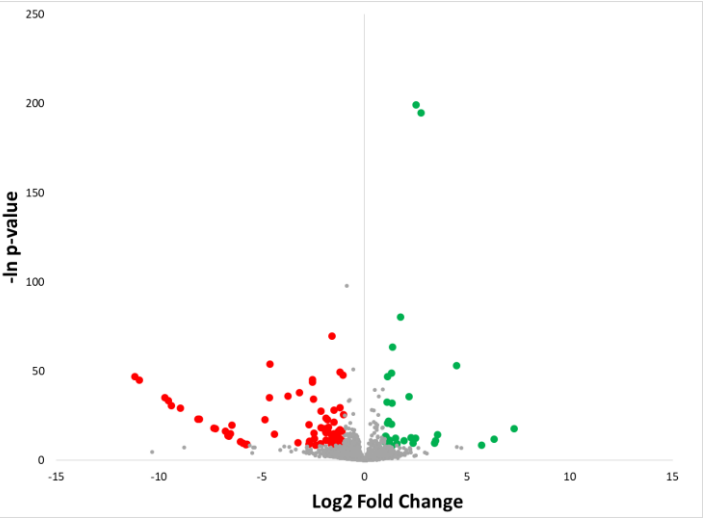

B.

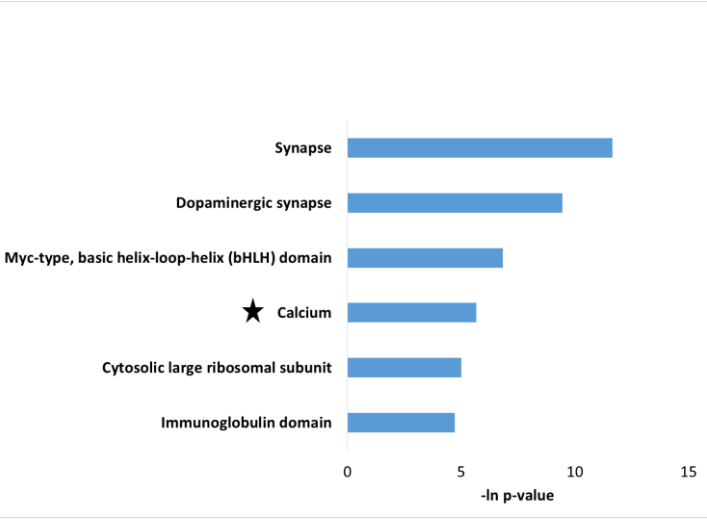

C.

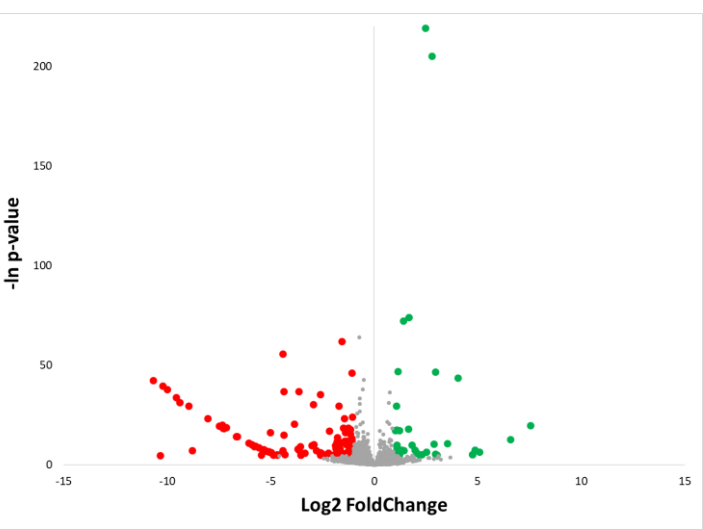

D.

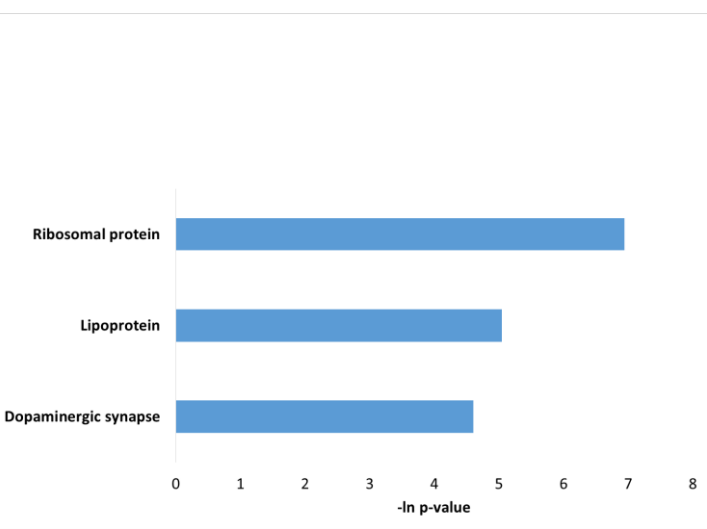

Supplement: s1 [file s1]

A.

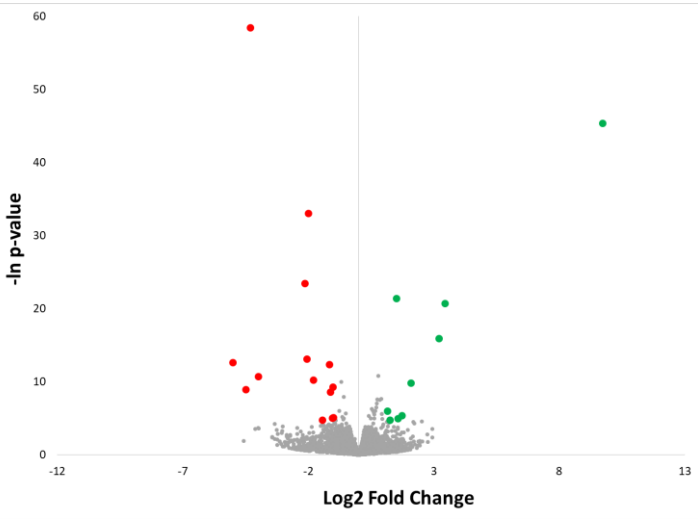

B.

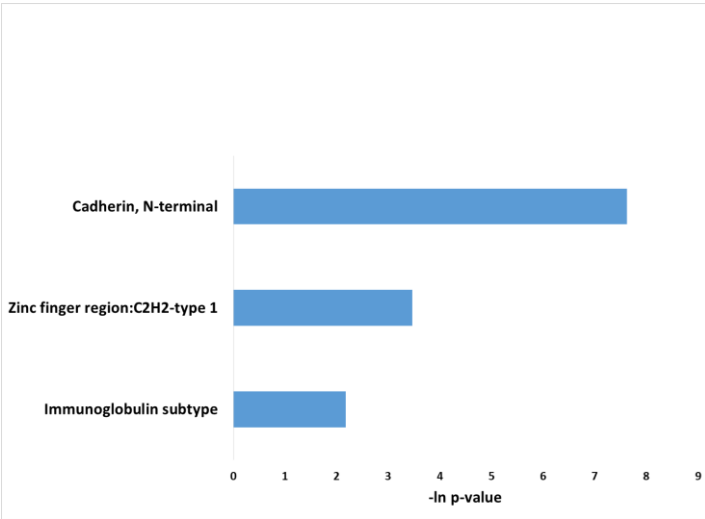

C.

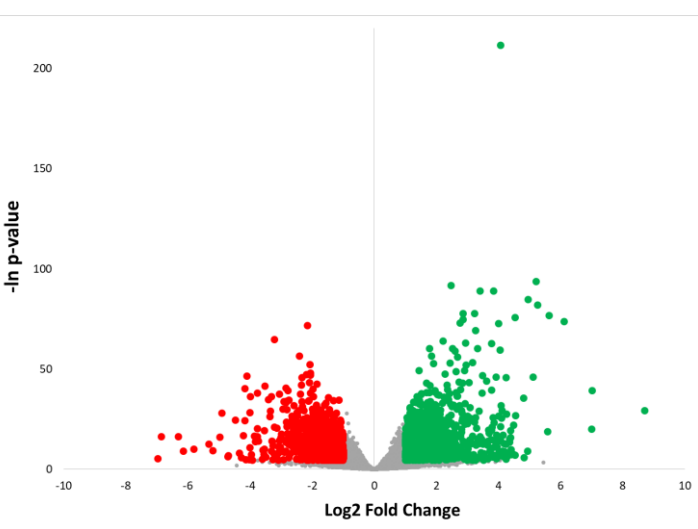

D.

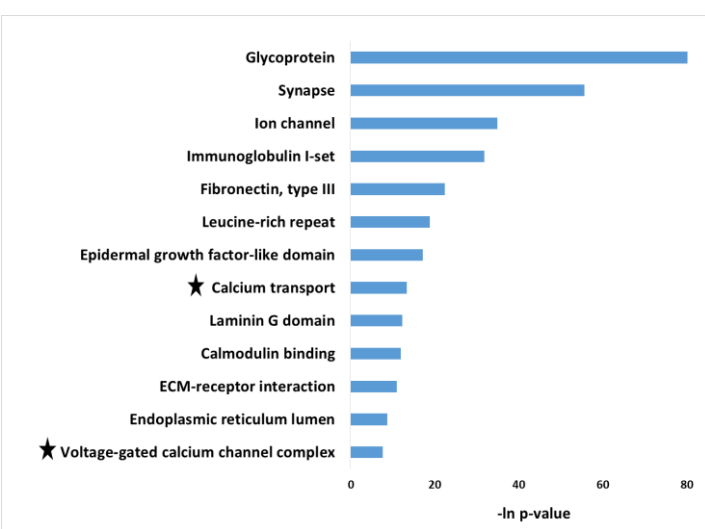

Supplement: s1 [file s1]

A.

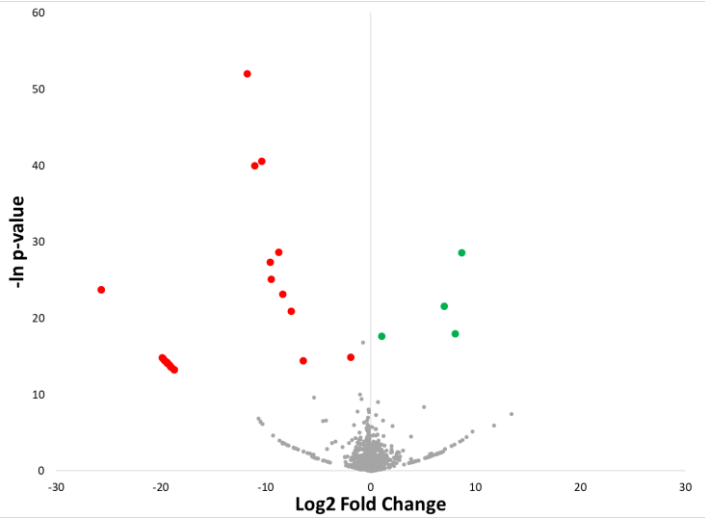

B.

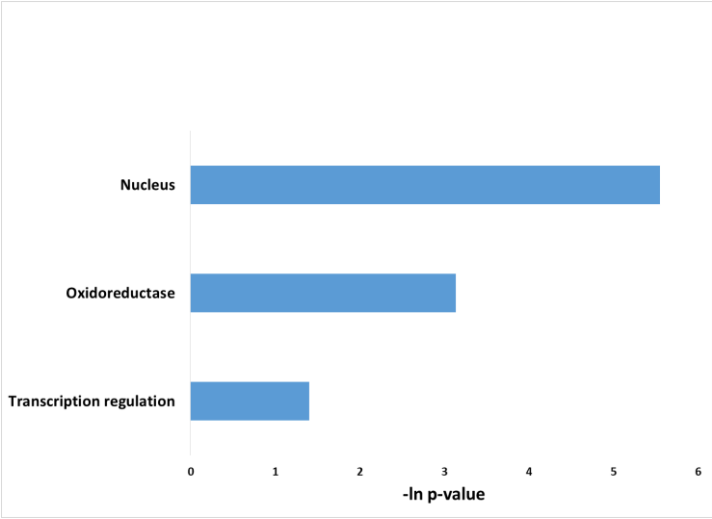

Supplement: s1 [file s1]

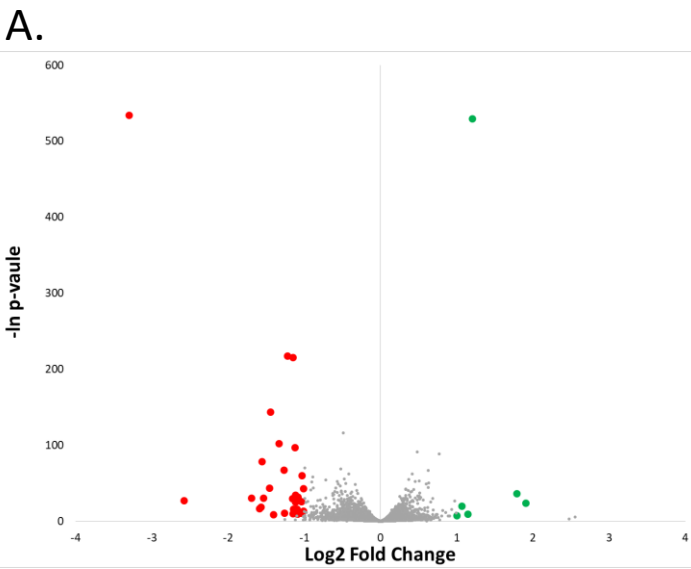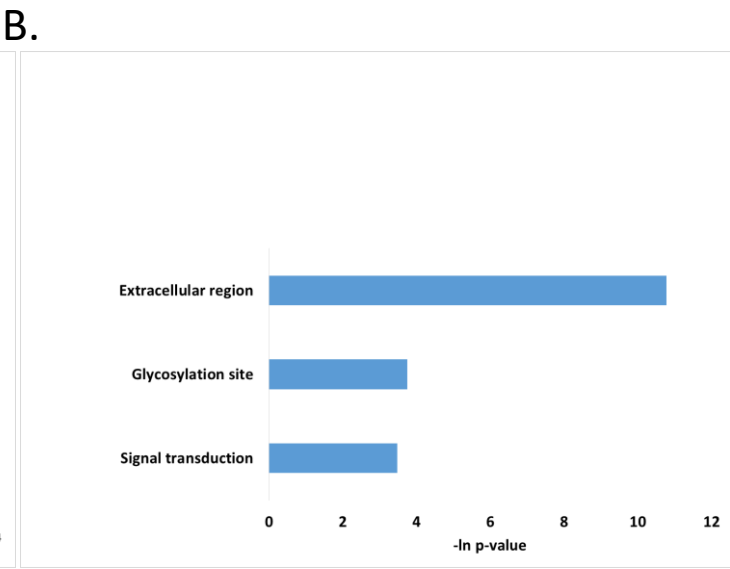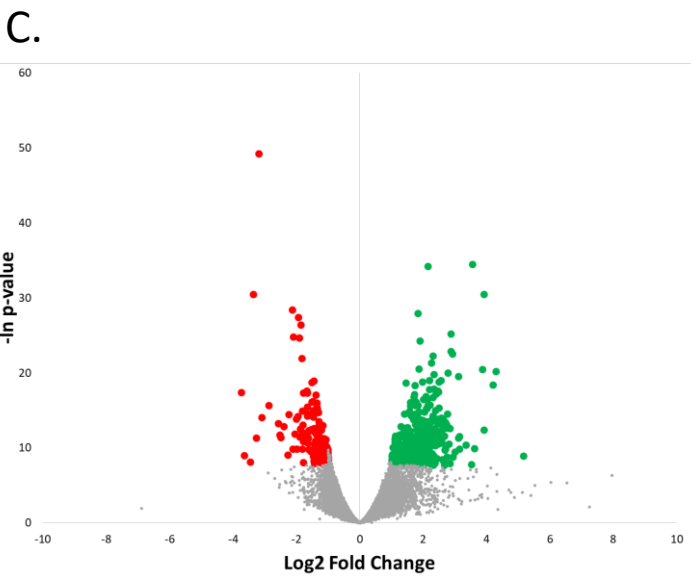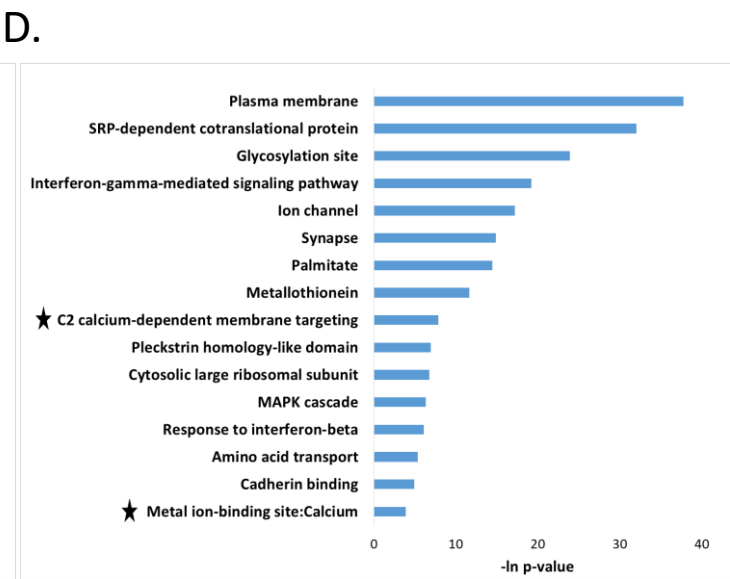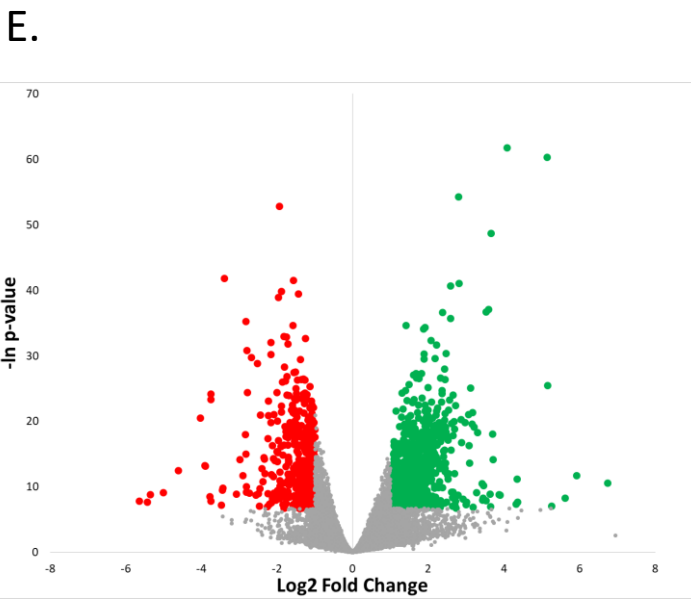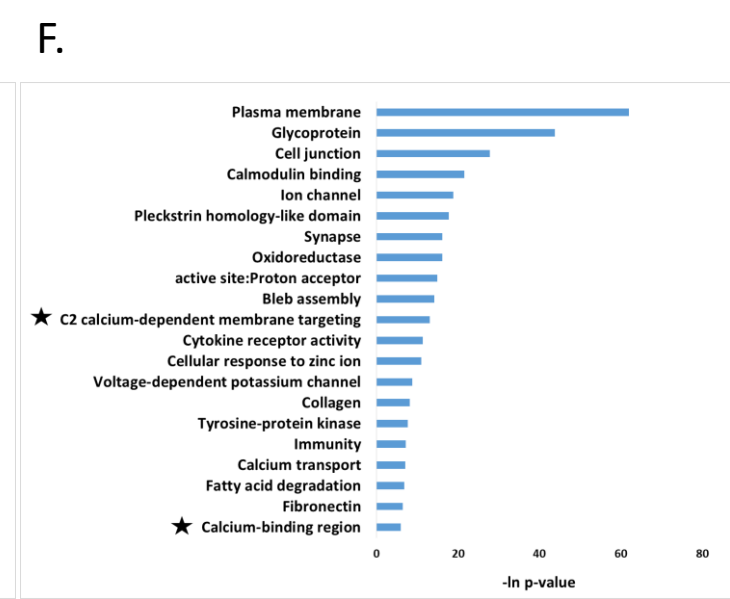

Supplement: s1 [file s1]
